# Supplementary material for: The removal of aqueous uranium by SBA-15 modified with phosphoramide: a combined experimental and DFT study
Source: Royal Society of Chemistry journal article supplement (doi:10.1039/c6ra12269h), 2016-01-01
Supplement: c6ra12269h1.pdf [file c6ra12269h1.pdf]

# Supporting Information

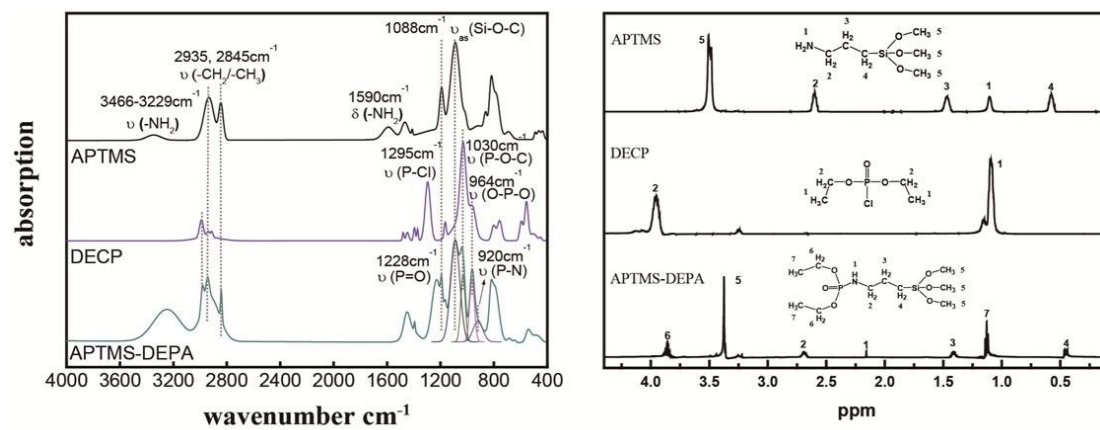

Fig. S1 IR (left) and <sup>1</sup>H-NMR (right) spectra of APTMS, DECP and APTMS-DEPA

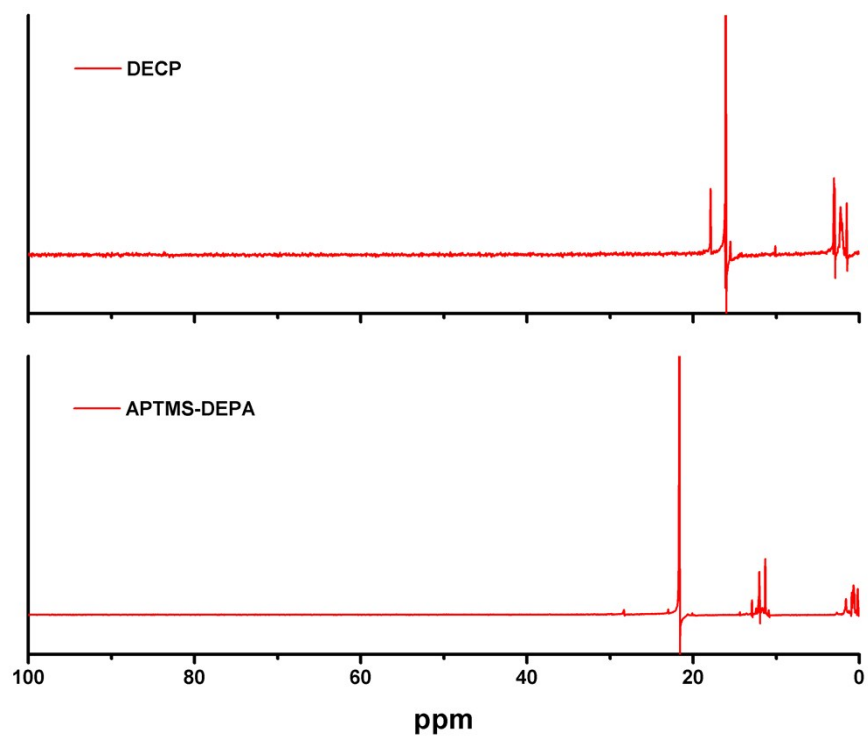

Fig. S2  $^{31}\text{P}$  NMR spectra for DECP and APTMS-DEPA

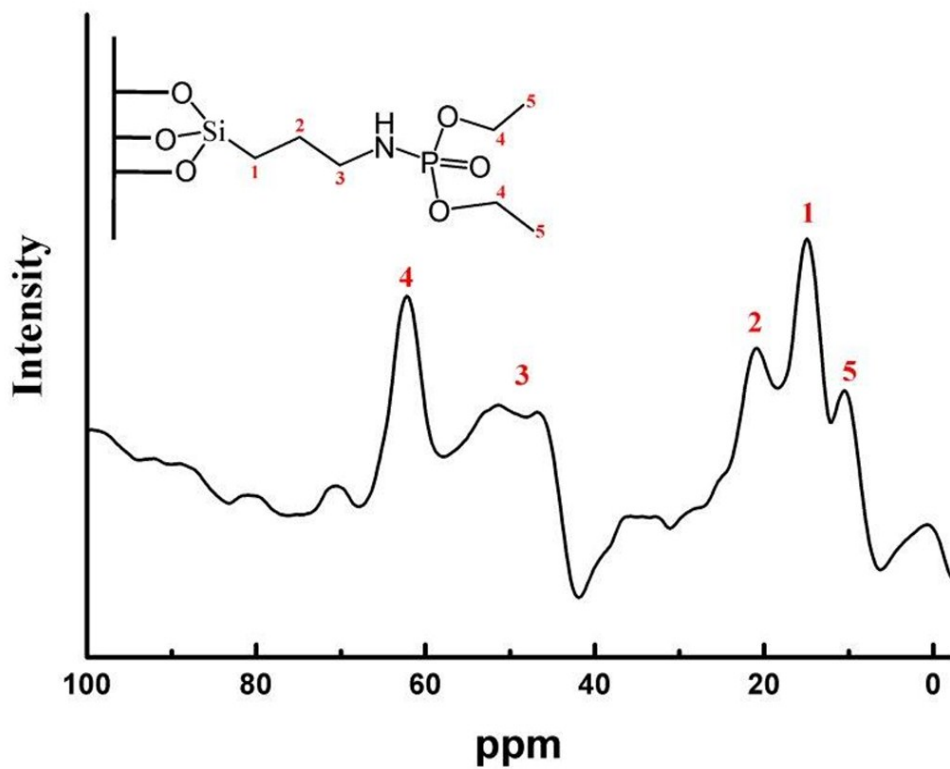

Fig. S3  $^{13}\text{C}$  NMR spectrum for SBA-12.5%DEPA

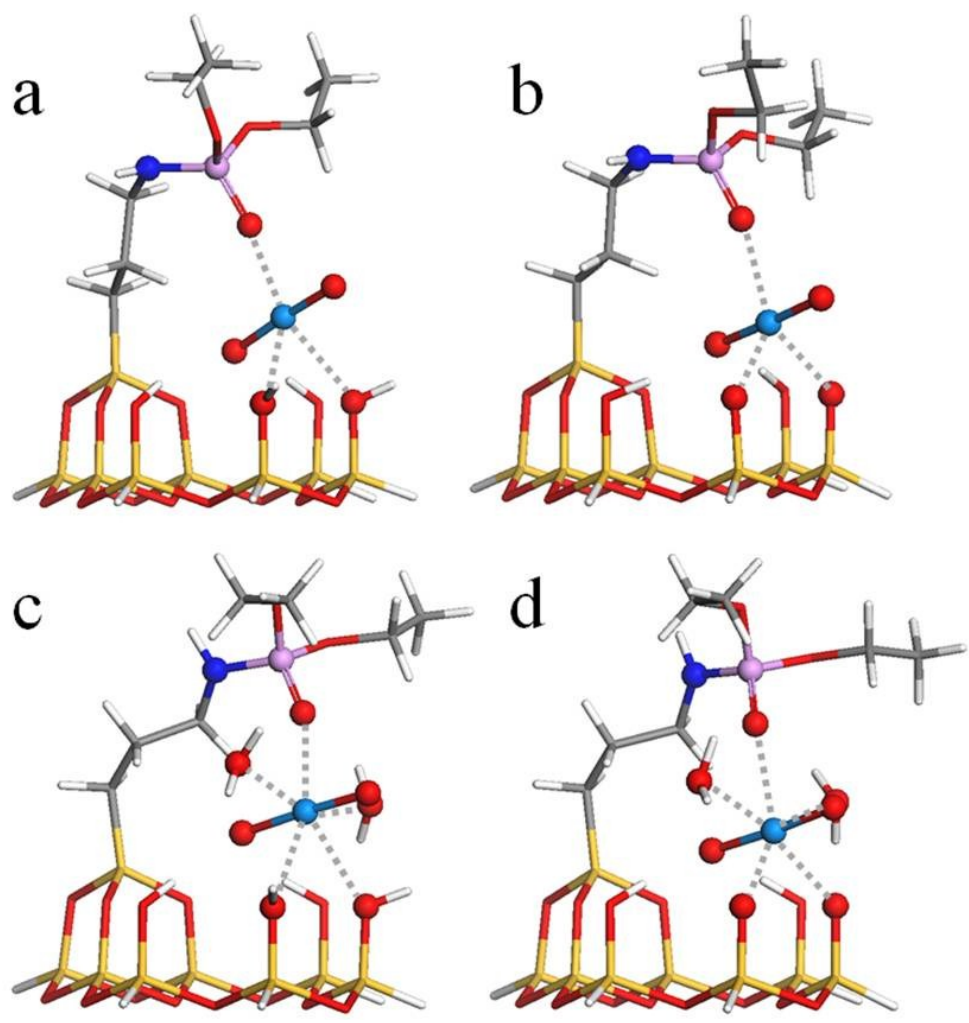

Fig. S4 Full optimized structures for four possible situations
